# Supplementary material for: Addressing the evidence to practice gap for complex interventions in primary care: a systematic review of reviews protocol
Source: HighWire-hosted journal article supplement (doi:10.1136/bmjopen-2014-005548), 2014-06-01
Supplement: bmjopen-2014-005548supp1.pdf [file bmjopen-2014-005548supp1.pdf]

## Data supplement file 1

Effective Practice and Organisation of Care taxonomy (EPOC)

[adapted from: <http://www.epoc.cochrane.org/en/handsearchers.html>]

| Category                   | Interventions                                                                                                                                                                                                                                                                                                                                                                                 |
|----------------------------|-----------------------------------------------------------------------------------------------------------------------------------------------------------------------------------------------------------------------------------------------------------------------------------------------------------------------------------------------------------------------------------------------|
| Professional interventions | <ul style="list-style-type: none"><li>• Distribution of educational materials</li><li>• Educational meetings</li><li>• Local consensus processes</li><li>• Educational outreach visits</li><li>• Local opinion leaders</li><li>• Patient-mediated interventions</li><li>• Audit and feedback</li><li>• Reminders</li><li>• Marketing</li><li>• Mass media</li></ul>                           |
| Financial interventions    | <ul style="list-style-type: none"><li>• Provider interventions</li></ul>                                                                                                                                                                                                                                                                                                                      |
| Organisation interventions | <ul style="list-style-type: none"><li>• Revision of professional roles</li><li>• Multidisciplinary teams</li><li>• Formal integration of services</li><li>• Skill mix changes</li><li>• Continuity of care</li><li>• Interventions to boost morale</li><li>• Communication and case discussion</li></ul>                                                                                      |
| Structural interventions   | <ul style="list-style-type: none"><li>• Changes to site/setting of service delivery</li><li>• Changes to physical structure</li><li>• Changes in medical records systems</li><li>• Changes in scope and nature of benefits of services</li><li>• Presence and organisation of quality monitoring</li><li>• Ownership of hospitals and other facilities</li><li>• Staff organisation</li></ul> |
| Regulatory interventions   | <ul style="list-style-type: none"><li>• Changes in medical liability</li><li>• Management of patient complaints</li><li>• Peer review</li><li>• Licensure</li></ul>                                                                                                                                                                                                                           |
